# Supplementary material
Source: PubMed Central journal article supplement (PMC8259657)
Supplement: ASN.2020091376SupplementaryData.pdf [file ASN.2020091376SupplementaryData.pdf]

Supplementary Figure 1

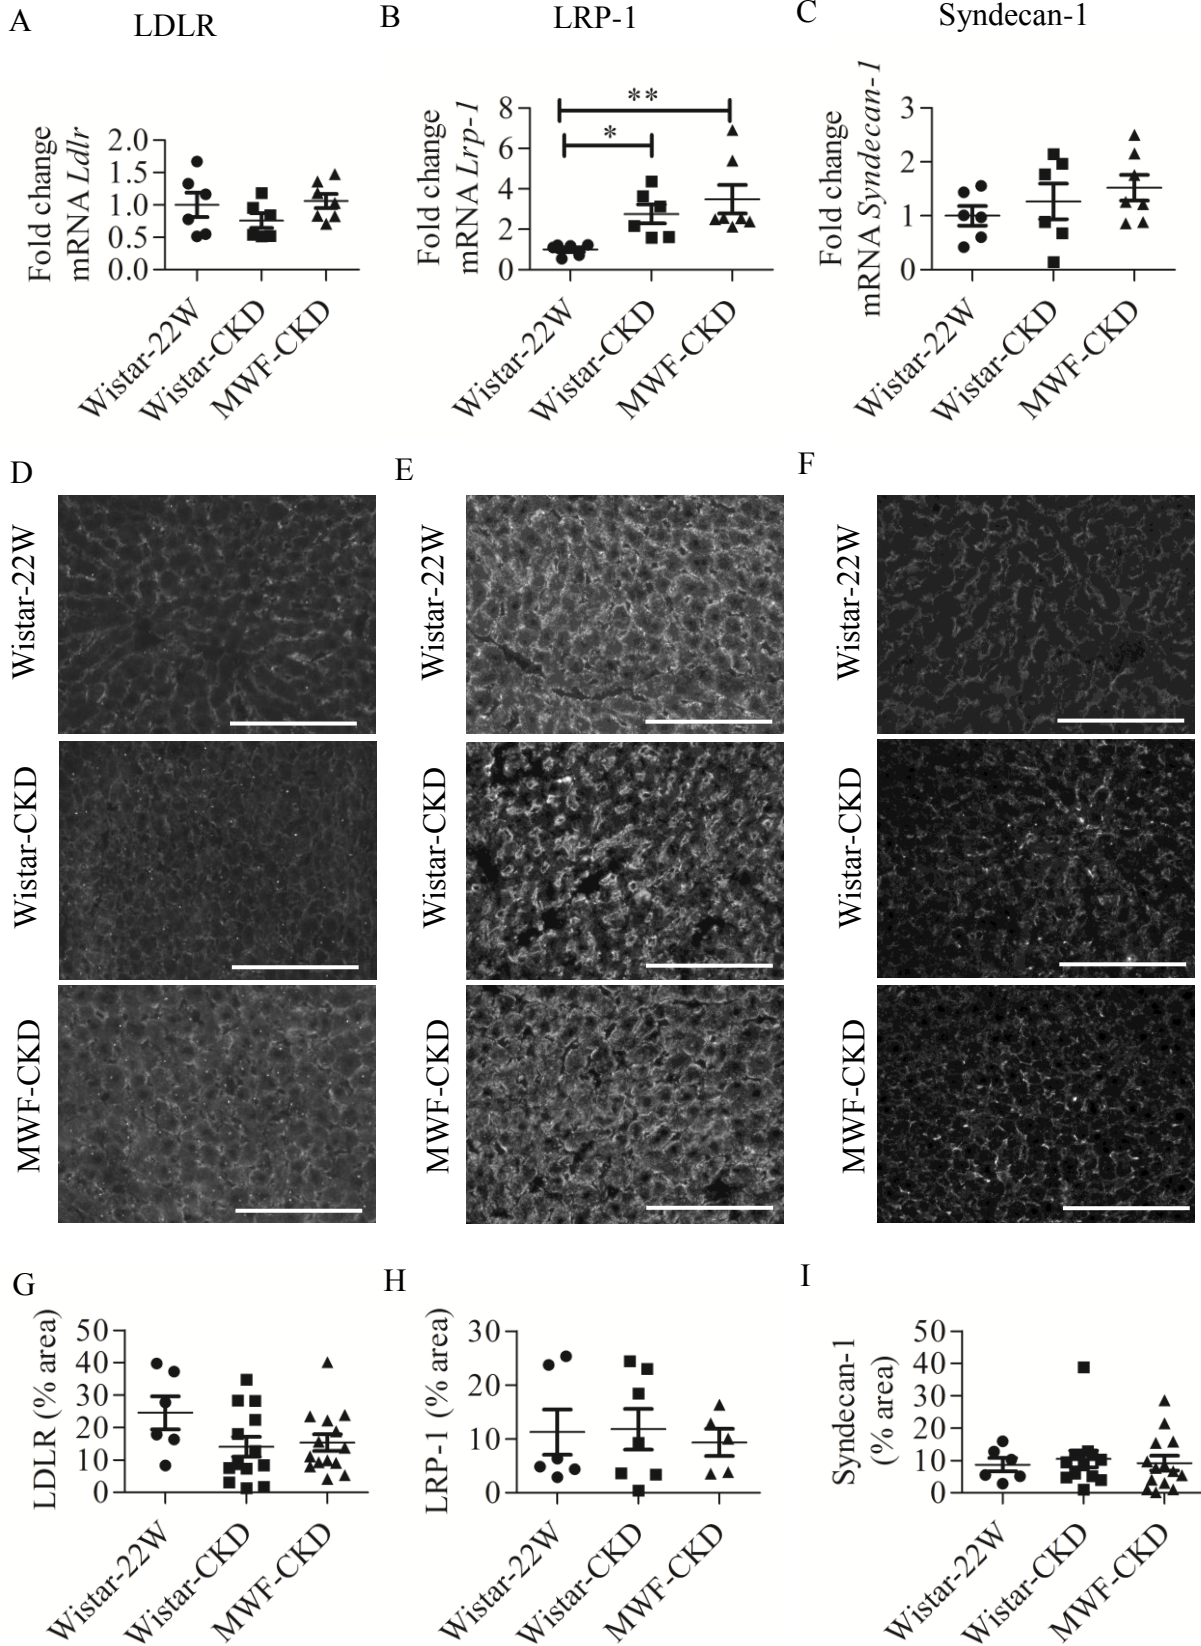

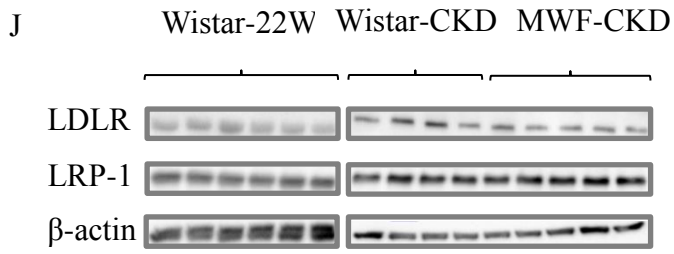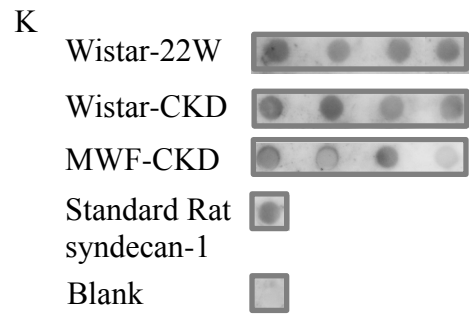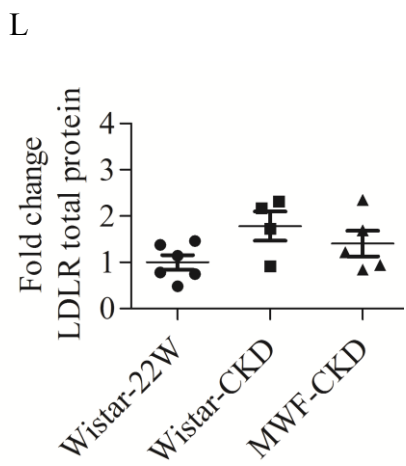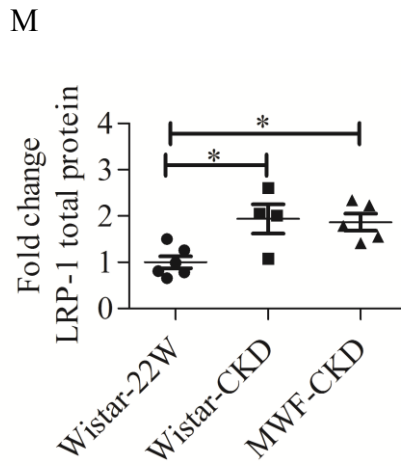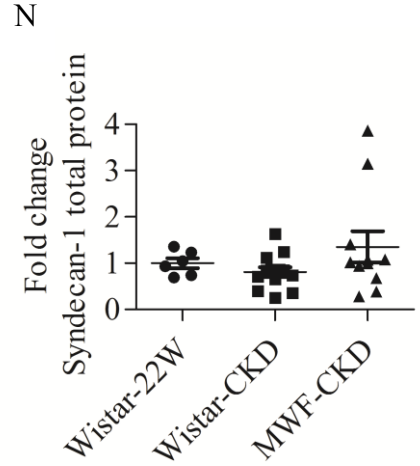

**Supplementary figure legend:**

**Supplementary Figure 1: Expression of hepatic lipoprotein receptors: LDLR, LRP-1 and syndecan-1 in Wistar-22W, Wistar-CKD and MWF-CKD rats.** (A,B,C): Fold change in mRNA expression of hepatic *Ldlr*, *Lrp-1* and *Syndecan-1* relative to *Gapdh*. (D,E,F) Immunofluorescence staining of hepatic LDLR, LRP-1 and syndecan-1. (G,H,I) Quantification of immunofluorescence stainings representing surface expression of hepatic LDLR, LRP-1 and syndecan-1. (J) Representative examples of LDLR, LRP-1 and  $\beta$ -actin by Western blot (K) and syndecan-1 by dot blot. (L,M,N). Quantification of western blots and dot blots. The results are presented as mean  $\pm$  SEM. \*:  $p < 0.05$ ; \*\*:  $p < 0.01$ . Scale bars in photomicrographs represent 150  $\mu$ m.

**Supplementary Table 1: Primer sequences used for qRT-PCR.**

| <b>Genes</b>      | <b>Forward 5'-3'</b> | <b>Reverse 3'-5'</b>   |
|-------------------|----------------------|------------------------|
| <i>Gapdh</i>      | CATCAAGAAGGTGGTGAAGC | ACCACCCTGTTGCTGTAG     |
| <i>Ext-1</i>      | GGAGAAAGCAAGGTTATGAG | CCTTTGAGTTATCCCAGAAATG |
| <i>Lrp-1</i>      | GTGTCTACTGGACTAACTGG | GAAATATTGAGGTGGGTGAC   |
| <i>Pcsk9</i>      | CAGACAGAGGAAGATAGCTC | GTTGAAGTCAGTGATGGTAAC  |
| <i>Syndecan-1</i> | Qiagen on demand     | Qiagen on demand       |
| <i>Ldlr</i>       | Qiagen on demand     | Qiagen on demand       |
